# Supplementary material for: A Comprehensive Sequence and Disease Correlation Analyses for the C-Terminal Region of CagA Protein of Helicobacter pylori
Source: PLoS One. 2009 Nov 6;4(11):e7736. doi: 10.1371/journal.pone.0007736 (PMC2768901; doi:10.1371/journal.pone.0007736)
Supplement: Tabld S4 — Frequencies of all sequence types All sequence types are listed in Table 3S in supplementary.pdf. The highlighted sequence types are removed in Table 3. (0.02 MB XLS) [file pone.0007736.s004.xls]

## Sheet: S4
	Table S4. Frequencies of all sequence types
	Seq. Class	Occ.	Seq. Class	Occ.	Seq. Class	Occ.	Seq. Class	Occ.
	ABD	240	ABC''C''	3	ABB''BC	1	ABD-ABD	1
	ABC	167	AB-ABD	2	ABB''BD	1	ABD-BD	1
	ABCC	51	AB'B'BD	2	ABB''C	1	ABD-D	1
	ABB''D	16	AB'BD	2	AB'BCC	1	AB-D''D''	1
	AB	15	ABCCCCC	2	AB'B'D'	1	A-C''	1
	ABCCC	10	AB'D	2	AB'-C	1	A-CCC	1
	AB'BC	6	AC'C	2	AB-C	1	AD'	1
	A-C	5	C	2	ABCB''CC	1	CC	1
	AB'-ABD	4	A	1	ABCCCC	1
	A-D	4	ABB''	1	A-B''D	1
	A-ABD	3	AB'B'BC	1	AB-D	1	Total	560
