# Supplementary material for: A Comprehensive Sequence and Disease Correlation Analyses for the C-Terminal Region of CagA Protein of Helicobacter pylori
Source: PLoS One. 2009 Nov 6;4(11):e7736. doi: 10.1371/journal.pone.0007736 (PMC2768901; doi:10.1371/journal.pone.0007736)
Supplement: Table S5 — Comparison of sequence classifications in literatures [1] T.Uchida, R. Kanada, Y. Tsukamoto, N. Hijiya, K. Matsuura, S. et al., Cancer Sci. 98 (2007) 521–528. [2] M. Naito, T. Yamazaki, R. Tsutsumi, H. Higashi, K. Onoe, et al., Gastroenterology 130 (2006) 1181–1190. (0.02 MB XLS) [file pone.0007736.s005.xls]

## Sheet: S5
	Table S5 Comparison of sequence classifications in literatures
	and in this work
	NCBI Accession #	Seq. Class in literature	Seq. Class in this work	The segment of different type names
	BAF452831	ABDD	ABB''D	AINRKIDRINKIASAGKGVGGFSGAGRSASPEPIYAQVAKKVSAKIDQLNEATS
	BAF452911	AC	A-C	VKAKIDQLNQAASGFGNVGQAG
	BAF453001	ABBB	AB'B'D'	AGQATSPEEPIYAQVNKKK, AGQATSPEEPIYATIDFDEANQAG
	BAC104642	ABBD	ABB''D	AINRKIDRINKIASAGKGVGGFSGAGRSTSPEEPIYAQVARKVSVKIDQLNEATS
	BAC104222	BABD	A-ABD	RKELNEKLFGNSNNNNNGLKNSTEPIYAQVAKKVSAKIDQLNEATS
	BAC104502	ABB	ABB''	AINRKIDRINKIASAGKGVGGFSGAGRSASPEPIYAQVAKKVSVKIDQLNEATS
