# Supplementary material for: A Comprehensive Sequence and Disease Correlation Analyses for the C-Terminal Region of CagA Protein of Helicobacter pylori
Source: PLoS One. 2009 Nov 6;4(11):e7736. doi: 10.1371/journal.pone.0007736 (PMC2768901; doi:10.1371/journal.pone.0007736)
Supplement: Table S6 — Distribution of multiple repeats of EPIYA segments (0.02 MB XLS) [file pone.0007736.s006.xls]

## Sheet: S6
Table S6. Distribution of multiple repeats of EPIYA segments
	# of repeats	1	2	3	4	5	6	7	>7	Total
	Occurrence	3	27	416	86	23	3	2	0	560
