# Supplementary material for: A Comprehensive Sequence and Disease Correlation Analyses for the C-Terminal Region of CagA Protein of Helicobacter pylori
Source: PLoS One. 2009 Nov 6;4(11):e7736. doi: 10.1371/journal.pone.0007736 (PMC2768901; doi:10.1371/journal.pone.0007736)
Supplement: Table S9 — The phylogenic tree of fragments ABC (0.40 MB XLS) [file pone.0007736.s009.xls]

## Sheet: S9
	Table S9. The phylogenic tree of fragments ABC
Phylogenic tree	ANo	StrainType	Disease	StrainName	Country
	ABO33892	ABC	DU	PD634	Italy
	ABO33894	ABC	DU	PD638	Italy
	ABO33891	ABC	DU	PD521	Italy
	AAG09909	ABC	G	CR56	Costa Rica
	CAL23517	ABC	G	Hp77-5	Greece
	CAK49214	ABC	GU	alcag113	Greece
	ABO33895	ABC	DU	PD682	Italy
	CAK49202	ABC	G	alcag244	Greece
	BAB87437	ABC	G	Alaska16	USA
	BAB87436	ABC	G	Alaska15	USA
	CAL23497	ABC	G	Hp83	Greece
	CAL23496	ABC	G	Hp81	Greece
	CAK49234	ABC	DU	alcag184	Greece
	CAK49231	ABC	GU	alcag159	Greece
	CAL23509	ABC	E	Hp30	Greece
	CAK49209	ABC	DU	alcag54	Greece
	CAL23504	ABC	G	Hp75	Greece
	CAL23499	ABC	G	Hp90	Greece
	CAL23500	ABC	E	Hp97	Greece
	CAL23478	ABC	DU	alcag4-1	Greece
	CAL29805	ABC	E	eva12-2-4	Greece
	CAK49222	ABC	GU	alcag161	Greece
	ABO33873	ABC	GC	PD3497K_1	Italy
	AAG09886	ABC	GC	CR7	Costa Rica
	CAL23505	ABC	E	Hp5	Greece
	CAL23521	ABC	G	eva9-2-1	Greece
	CAK49212	ABC	DU	alcag84	Greece
	CAL23494	ABC	G	Hp78	Greece
	AAG09906	ABC	G	CR53	Costa Rica
	AAG09899	ABC	G	CR42	Costa Rica
	AAG09893	ABC	GC	CR21	Costa Rica
	AAF63759	ABC	G	SS1	China
	CAK49236	ABC	G	eva19	Greece
	BAB87428	ABC	G	Thailand8W	Thailand
	BAB87462	ABC	G	USA35	USA
	BAC10434	ABC	G	OK112	Japan
	CAL23514	ABC	G	Hp35	Greece
	AAG09891	ABC	GC	CR19	Costa Rica
	BAB87455	ABC	G	ColombiaNA2012	Colombia
	AAG09888	ABC	GC	CR9	Costa Rica
	AAG09901	ABC	G	CR48	Costa Rica
	CAK49230	ABC	DU	alcag118	Greece
	CAK49224	ABC	DU	alcag166	Greece
	CAL29807	ABC	E	Hp18	Greece
	CAL23512	ABC	E	Hp95	Greece
	BAB87452	ABC	G	ColombiaNA1987	Colombia
	CAK49208	ABC	DU	alcag50	Greece
	CAL23519	ABC	E	Hp92	Greece
	CAL23493	ABC	G	Hp29	Greece
	AAG09885	ABC	GC	CR6	Costa Rica
	BAB87450	ABC	G	ColombiaNA1769	Colombia
	AAG09911	ABC	G	CR58	Costa Rica
	CAL23501	ABC	GU	alcag40-2	Greece
	CAK49204	ABC	GU	alcag40	Greece
	CAK49233	ABC	DU	alcag10	Greece
	ABO33876	ABC	GC	PD2968K_1	Italy
	CAL29804	ABC	E	Hp93	Greece
	ABO33878	ABC	GC	PD3085K	Italy
	CAK49215	ABC	DU	alcag123	Greece
	BAB87445	ABC	G	ColombiaNA1693	Colombia
	BAB87461	ABC	GC	Italy329	Italy
	ABO33890	ABC	DU	PD308	Italy
	CAL23522	ABC	DU	alcag76	Greece
	BAD51753	ABC	G	OK155	Japan
	BAD51756	ABC	G	OK160	Japan
	CAL23510	ABC	G	Hp43	Greece
	CAL23503	ABC	E	Hp94	Greece
	ABO33868	ABC	GC	PD5670K	Italy
	CAL23507	ABC	G	Hp82	Greece
	CAL23511	ABC	E	Hp64	Greece
	BAB87432	ABC	G	Alaska6	USA
	ABO33864	ABC	GC	PD4086K	Italy
	CAK49225	ABC	G	alcag177	Greece
	BAF45268	ABC	G	Patient #03-376	Japan
	BAD51750	ABC	DU	OK130	Japan
	BAD51760	ABC	DU	OK185	Japan
	BAD51761	ABC	DU	OK187	Japan
	BAD51751	ABC	G	OK139	Japan
	BAD51758	ABC	DU	OK180	Japan
	BAD51763	ABC	DU	OK197	Japan
	BAD51752	ABC	DU	OK144	Japan
	BAD51766	ABC	DU	OK210	Japan
	CAL23515	ABC	G	Hp72	Greece
	CAK49205	ABC	DU	alcag9	Greece
	CAK49223	ABC	GU	alcag49	Greece
	CAL23488	ABC	E	Hp96	Greece
	BAB87434	ABC	G	Alaska12	USA
	BAB87431	ABC	G	Alaska1	USA
	CAK49229	ABC	DU	eva25	Greece
	CAL23498	ABC	G	Hp88	Greece
	CAK49235	ABC	E	alcag73	Greece
	ABO33866	ABC	GC	PD5951K_1	Italy
	CAL23508	ABC	E	Hp6	Greece
	BAB87441	ABC	G	Arizona1	USA
	AAG09892	ABC	GC	CR20	Costa Rica
	ABO33865	ABC	GC	PD5305K	Italy
	BAB87466	ABC	G	USA2791	USA
	NP_207343	ABC	G	26695	USA
	BAB87435	ABC	G	Alaska13	USA
	ABO33872	ABC	GC	PD4467K	Italy
	ABO33893	ABC	DU	PD636	Italy
	BAB87442	ABC	G	Arizona2	USA
	ABO33870	ABC	GC	PD3202K	Italy
	CAK49232	ABC	DU	alcag101	Greece
	CAL29806	ABC	G	eva21	Greece
	CAL29808	ABC	G	alcag7-7	Greece
	CAL23489	ABC	E	Hp91	Greece
	CAL23513	ABC	G	Hp45	Greece
	CAK49213	ABC	E	alcag102	Greece
	CAK49217	ABC	DU	alcag154	Greece
	CAL23492	ABC	E	Hp24	Greece
	CAK49226	ABC	DU	alcag212	Greece
	CAK49211	ABC	E	alcag81	Greece
	CAK49210	ABC	GU	alcag80	Greece
	CAK49201	ABC	E	alcag144	Greece
	AAG09882	ABC	GC	CR2	Costa Rica
	BAB87451	ABC	G	ColombiaNA1770	Colombia
	BAB87457	ABC	GC	Colombia69	Colombia
	AAG09897	ABC	G	CR35	Costa Rica
	AAG09889	ABC	GC	CR12	Costa Rica
	AAG09894	ABC	GC	CR22	Costa Rica
	AAG09910	ABC	G	CR57	Costa Rica
	AAG09896	ABC	G	CR29	Costa Rica
	AAG09912	ABC	G	CR59	Costa Rica
	CAK49206	ABC	DU	alcag35	Greece
	AAG09907	ABC	G	CR54	Costa Rica
	CAK49218	ABC	GU	alcag196	Greece
	CAK49216	ABC	DU	alcag145	Greece
	CAK49220	ABC	G	alcag245	Greece
	CAK49207	ABC	DU	alcag42	Greece
	CAK49219	ABC	DU	alcag237	Greece
	CAK49203	ABC	DU	alcag224	Greece
	BAB87465	ABC	G	Kazak3	Kazakhstan
	BAB87439	ABC	G	Alaska18	USA
	BAB87438	ABC	G	Alaska17	USA
	BAB87427	ABC	G	Thailand7W	Thailand
	BAB87463	ABC	G	Kazak1	Kazakhstan
	CAL23506	ABC	G	Hp89	Greece
	CAK49227	ABC	G	eva8	Greece
	CAL23490	ABC	G	Hp12	Greece
	CAK49221	ABC	DU	alcag37	Greece
	CAL23495	ABC	G	Hp80	Greece
	CAL23491	ABC	E	Hp19	Greece
	CAL23523	ABC	G	alcag115	Greece
	CAK49228	ABC	G	eva15	Greece
