# Supplementary material for: A Comprehensive Sequence and Disease Correlation Analyses for the C-Terminal Region of CagA Protein of Helicobacter pylori
Source: PLoS One. 2009 Nov 6;4(11):e7736. doi: 10.1371/journal.pone.0007736 (PMC2768901; doi:10.1371/journal.pone.0007736)
Supplement: Table S11 — The phylogenic tree of fragments ABCC (0.40 MB XLS) [file pone.0007736.s011.xls]

## Sheet: S11
	Table S11. The phylogenic tree of fragments ABD
Phylogenic tree	ANo	StrainType	Disease	StrainName	Country
	BAB87376	ABD	DU	JapanK25	Japan
	CAH55616	ABD	G	Z28	China
	BAB87387	ABD	G	JapanK46	Japan
	ABM97494	ABD	DU	JS0602	China
	BAB87416	ABD	G	Taiwan198	China
	BAB87429	ABD	G	Thailand13A	Thailand
	BAB87412	ABD	G	Taiwan175	China
	BAB87414	ABD	G	Taiwan188	China
	BAB87413	ABD	G	Taiwan179	China
	BAB87408	ABD	GC	Korea7	Korea
	BAB87409	ABD	GC	Korea9	Korea
	BAF45288	ABD	GU	Patient #02-241	Japan
	BAC77011	ABD	DU	China:106a	China
	BAC10426	ABD	G	F36	Japan
	BAC77015	ABD	DU	China:122b	China
	BAB20918	ABD	PU	J-207	Japan
	BAC77007	ABD	DU	China:101b	China
	BAC81797	ABD	MALT	THP1475(ML4)	Japan
	BAF45290	ABD	GU	Patient #04-72	Japan
	BAB87385	ABD	G	JapanK43	Japan
	BAB87389	ABD	DU	JapanK48	Japan
	BAB87422	ABD	G	Vietnam2692	Viet Nam
	BAB20920	ABD	PU	J-230	Japan
	BAB20919	ABD	PU	J-216	Japan
	BAF45286	ABD	DU	Patient #04-512	Japan
	BAC81815	ABD	GU	THP418(GU5)	Japan
	BAC81790	ABD	GC	THP455(GC3)	Japan
	BAC77003	ABD	DU	China:067a	China
	BAC81793	ABD	GC	THP1659(GC6)	Japan
	BAC77005	ABD	G	China:073b	China
	ABM97495	ABD	DU	JS0603	China
	BAF45284	ABD	DU	Patient #03-276b	Japan
	BAF45296	ABD	GU	Patient #03-166	Japan
	BAF45289	ABD	GU	Patient #04-232	Japan
	BAF45280	ABD	DU	Patient #02-596	Japan
	BAC77001	ABD	DU	China:028a	China
	BAC81804	ABD	G	THP437(CG5)	Japan
	BAB87377	ABD	GU	JapanK26	Japan
	BAF45260	ABD	GC	Patient #05-70	Japan
	BAF45287	ABD	GU	Patient #04-266	Japan
	BAB87425	ABD	G	Vietnam2706	Viet Nam
	BAB87423	ABD	G	Vietnam2704	Viet Nam
	BAB87407	ABD	G	Korea2-3	Korea
	BAF45263	ABD	G	Patient #04-274	Japan
	BAC81796	ABD	MALT	THP1260(ML3)	Japan
	BAE97706	ABD	GC	OK314	Japan
	BAC81795	ABD	MALT	THP221(ML2)	Japan
	BAC81800	ABD	G	THP405(CG1)	Japan
	BAC10433	ABD	G	OK109	Japan
	BAD51754	ABD	DU	OK158	Japan
	BAC10420	ABD	G	F15	Japan
	BAB87411	ABD	GC	Korea23	Korea
	BAE97697	ABD	GC	OK302	Japan
	BAF45278	ABD	DU	Patient #04-116	Japan
	BAF45274	ABD	DU	Patient #04-392	Japan
	BAD51744	ABD	G	F37	Japan
	BAD51764	ABD	DU	OK204	Japan
	BAE97699	ABD	GC	OK306	Japan
	BAE97703	ABD	GC	OK311	Japan
	BAB87424	ABD	G	Vietnam2705	Viet Nam
	BAC77012	ABD	G	China:108a	China
	BAB87397	ABD	GU	JapanK85	Japan
	BAC81791	ABD	GC	THP1730(GC4)	Japan
	BAE97704	ABD	GC	OK312	Japan
	BAC81816	ABD	GU	THP428(GU6)	Japan
	BAF45307	ABD	GC	Patient #04-210	Japan
	BAF45285	ABD	DU	Patient #04-38	Japan
	BAB87386	ABD	G	JapanK44	Japan
	BAB87381	ABD	GC	JapanK34	Japan
	BAB87373	ABD	G	JapanK12	Japan
	BAF45294	ABD	GU	Patient #04-366	Japan
	BAC81792	ABD	GC	THP1632(GC5)	Japan
	BAC81806	ABD	G	THP465(GP1)	Japan
	BAB20917	ABD	G	J-198	Japan
	BAC77010	ABD	G	China:105a	China
	BAB87384	ABD	GC	JapanK42	Japan
	BAF45295	ABD	GU	Patient #04-518	Japan
	BAB20928	ABD	GC	J-566	Japan
	BAC77009	ABD	DU	China:103a	China
	BAB87417	ABD	G	HongKong209	China
	BAB87419	ABD	G	HongKong222	China
	BAC10419	ABD	G	F13	Japan
	BAB87410	ABD	GC	Korea12	Korea
	BAB87401	ABD	G	JapanK217	Japan
	BAB87383	ABD	DU	JapanK41	Japan
	BAB87393	ABD	GC	JapanK69	Japan
	BAF45265	ABD	G	Patient #02-295	Japan
	BAB20915	ABD	G	J-149	Japan
	BAE97708	ABD	GC	OK317	Japan
	BAC10435	ABD	G	OK129	Japan
	BAD51755	ABD	G	OK159	Japan
	BAE97696	ABD	GC	OK301	Japan
	BAC10431	ABD	G	OK101	Japan
	BAC81821	ABD	DU	THP464(DU5)	Japan
	BAB87382	ABD	DU	JapanK35	Japan
	BAD51749	ABD	G	OK118	Japan
	BAD51748	ABD	DU	OK113	Japan
	BAC81788	ABD	GC	THP349(GC1)	Japan
	BAF45275	ABD	DU	Patient #04-164	Japan
	BAE97705	ABD	GC	OK313	Japan
	BAF45306	ABD	GC	Patient #02-160	Japan
	BAB87395	ABD	G	JapanK80	Japan
	BAB87375	ABD	G	JapanK18	Japan
	BAC10421	ABD	G	F16	Japan
	BAB87379	ABD	G	JapanK31	Japan
	CAH55612	ABD	G	Z7	China
	BAC77008	ABD	DU	China:102a	China
	BAF45269	ABD	G	Patient #04-570	Japan
	BAC77000	ABD	G	China:018a	China
	BAB87388	ABD	GU	JapanK47	Japan
	BAB20921	ABD	G	J-241	Japan
	BAF45270	ABD	DU	Patient #04-16	Japan
	BAF45262	ABD	G	Patient #02-211	Japan
	BAF45305	ABD	GC	Patient #04-494	Japan
	BAD51762	ABD	G	OK194	Japan
	BAC77016	ABD	DU	China:125a	China
	BAB87418	ABD	G	HongKong218	China
	BAB87420	ABD	G	HongKong230	China
	BAB87421	ABD	G	HongKong246	China
	BAB87403	ABD	GC	JapanK260	Japan
	BAB87378	ABD	DU	JapanK30	Japan
	BAC81805	ABD	G	THP444(CG6)	Japan
	BAC81789	ABD	GC	THP463(GC2)	Japan
	BAF45264	ABD	G	Patient #04-416	Japan
	BAC81787	ABD	GU	TN2(GU1)	Japan
	BAF45266	ABD	G	Patient #04-306	Japan
	BAF45277	ABD	DU	Patient #04-276	Japan
	BAF45271	ABD	DU	Patient #04-526	Japan
	BAF45297	ABD	GU	Patient #04-264	Japan
	BAF45272	ABD	DU	Patient #03-530	Japan
	BAB87406	ABD	G	JapanO873	Japan
	BAB87405	ABD	G	JapanO552	Japan
	BAF45293	ABD	GU	Patient #03-292	Japan
	BAF45299	ABD	GU	Patient #04-236	Japan
	BAF45298	ABD	GU	Patient #04-396	Japan
	BAB20929	ABD	GC	J-578	Japan
	BAE97701	ABD	GC	OK309	Japan
	BAF45281	ABD	DU	Patient #02-599	Japan
	BAC81819	ABD	DU	THP585(DU3)	Japan
	BAF45304	ABD	GC	Patient #04-288	Japan
	BAF45267	ABD	G	Patient #04-474	Japan
	ABM90639	ABD	GU	JS0601	China
	BAC81822	ABD	DU	THP432(DU6)	Japan
	BAB87372	ABD	GU	JapanK9	Japan
	BAF45276	ABD	DU	Patient #04-456	Japan
	BAF45301	ABD	GU	Patient #04-378	Japan
	BAC81801	ABD	G	THP445(CG2)	Japan
	BAF45302	ABD	MALT	Patient #04-304	Japan
	BAB87398	ABD	G	JapanK89	Japan
	BAB87400	ABD	DU	JapanK101	Japan
	BAB87399	ABD	GC	JapanK96	Japan
	BAF45303	ABD	GC	Patient #04-140	Japan
	BAF45273	ABD	DU	Patient #02-559	Japan
	BAB87396	ABD	GC	JapanK83	Japan
	BAB87391	ABD	G	JapanK61	Japan
	BAC77004	ABD	G	China:071b	China
	BAF45282	ABD	DU	Patient #04-156	Japan
	BAE97698	ABD	GC	OK305	Japan
	AAF17597	ABD	GC	GC401(F32)	Japan
	BAF45261	ABD	G	Patient #02-248	Japan
	BAF45279	ABD	DU	Patient #04-370	Japan
	BAB87371	ABD	GU	JapanK1	Japan
	BAD13880	ABD	GC	F32	Japan
	BAB87415	ABD	G	Taiwan190	China
	BAF45292	ABD	GU	Patient #04-334	Japan
	BAC81814	ABD	GU	THP385(GU4)	Japan
	BAC77013	ABD	DU	China:113b	China
	BAC77017	ABD	G	China:128a	China
	BAC77014	ABD	DU	China:120a	China
