# Supplementary material for: A Comprehensive Sequence and Disease Correlation Analyses for the C-Terminal Region of CagA Protein of Helicobacter pylori
Source: PLoS One. 2009 Nov 6;4(11):e7736. doi: 10.1371/journal.pone.0007736 (PMC2768901; doi:10.1371/journal.pone.0007736)
Supplement: Table S13 — The information of redundant sequences *The sequences under ANo2 are completely same as or cover that under Ano. **Length2 are the length of sequences under ANo2. (0.02 MB XLS) [file pone.0007736.s013.xls]

## Sheet: S13
	Table S13. The information of redundant sequences
	SeqNum	ANo	GI	Strain	Length	ANo2*	Length2**
	1	BAC10497	22336016	OK181	327	BAD51759	1148
	2	BAC10449	22335841	F57	339	BAD51759	1148
	3	BAC10437	22335796	F23	348	BAD51742	1172
	4	BAC10496	22336012	OK158	352	BAD51754	1173
	5	BAC10487	22335978	OK113	352	BAD51748	1182
	6	BAC10500	22336028	OK212	353	BAD51748	1182
	7	BAC10499	22336024	OK206	354	BAD51748	1182
	8	BAC10493	22336000	OK144	359	BAD51752	1183
	9	BAC10489	22335985	OK130	359	BAD51750	1183
	10	BAC10492	22335997	OK139	362	BAD51751	1183
	11	BAC10486	22335974	OK100	391	BAD51751	1183
	12	BAC10452	22335853	F75	409	BAD51751	1183
	13	BAB20926	12225026	NCTC 11637	1147	BAD51751	1183
	14	CAA49633	394913	CCUG 17874	1147	AAC44706	1147
	15	AAE51635	14092894		1147	P80200	1147
	16	AAE43948	12810033		1147	P80200	1147
	17	AAD06073	4155035	J99	1167	NP_223213	1167
	18	BAD14072	46091635	OK129	1172	BAC10435	1172
	19	BAD13963	46091522	OK101	1172	BAC10431	1172
	20	BAD13799	46091352	F16	1172	BAC10421	1172
	21	BAD14018	46091579	OK109	1178	BAC10433	1178
	22	BAD14045	46091607	OK112	1180	BAC10434	1180
	23	AAD07614	2313664	26695	1186	NP_207343	1186
	24	YP_627265	108562949	HPAG1	1200	ABF84591	1200
	25	BAD13908	46091465	F79	1216	BAC10428	1216
	26	BAD13935	46091493	F80	1222	BAC10429	1222
	27	BAD13853	46091408	F28	1238	BAC10425	1238
	28	BAA19853	2073135	ATCC43526	1247	AAB58747	1247
	29	BAB20923	12225020	ATCC43526	1247	AAB58747	1247
	30	BAD13990	46091550	OK107	1251	BAC10432	1251
	31	BAD13826	46091380	F17	1275	BAC10422	1275
